# Supplementary material for: Evaluation of Semi-Solid-State Fermentation of Elaeocarpus serratus L. Leaves and Black Soymilk by Lactobacillus plantarum on Bioactive Compounds and Antioxidant Capacity
Source: Foods. 2021 Mar 26;10(4):704. doi: 10.3390/foods10040704 (PMC8065616; doi:10.3390/foods10040704)
Supplement: Supplementary file 1 [file foods-10-00704-s001.pdf]

**Supplementary Materials**

**Evaluation of Semi-Solid-State Fermentation of *Elaeocarpus serratus* L. Leaves and Black Soymilk by *Lactobacillus plantarum* on Bioactive Compounds and Antioxidant Capacity**

Chia-Yu Tsui and Chun-Yao Yang \*

Department of Food Science, Fu Jen Catholic University,  
No. 510, Zhongzheng Rd., Xinzhuang Dist., New Taipei City 242062, Taiwan (R.O.C.)

\*Corresponding author. Tel.: +886 2 29053624; fax: +886 2 22093271.

E-mail address : 133810@mail.fju.edu.tw (C.Y. Yang).

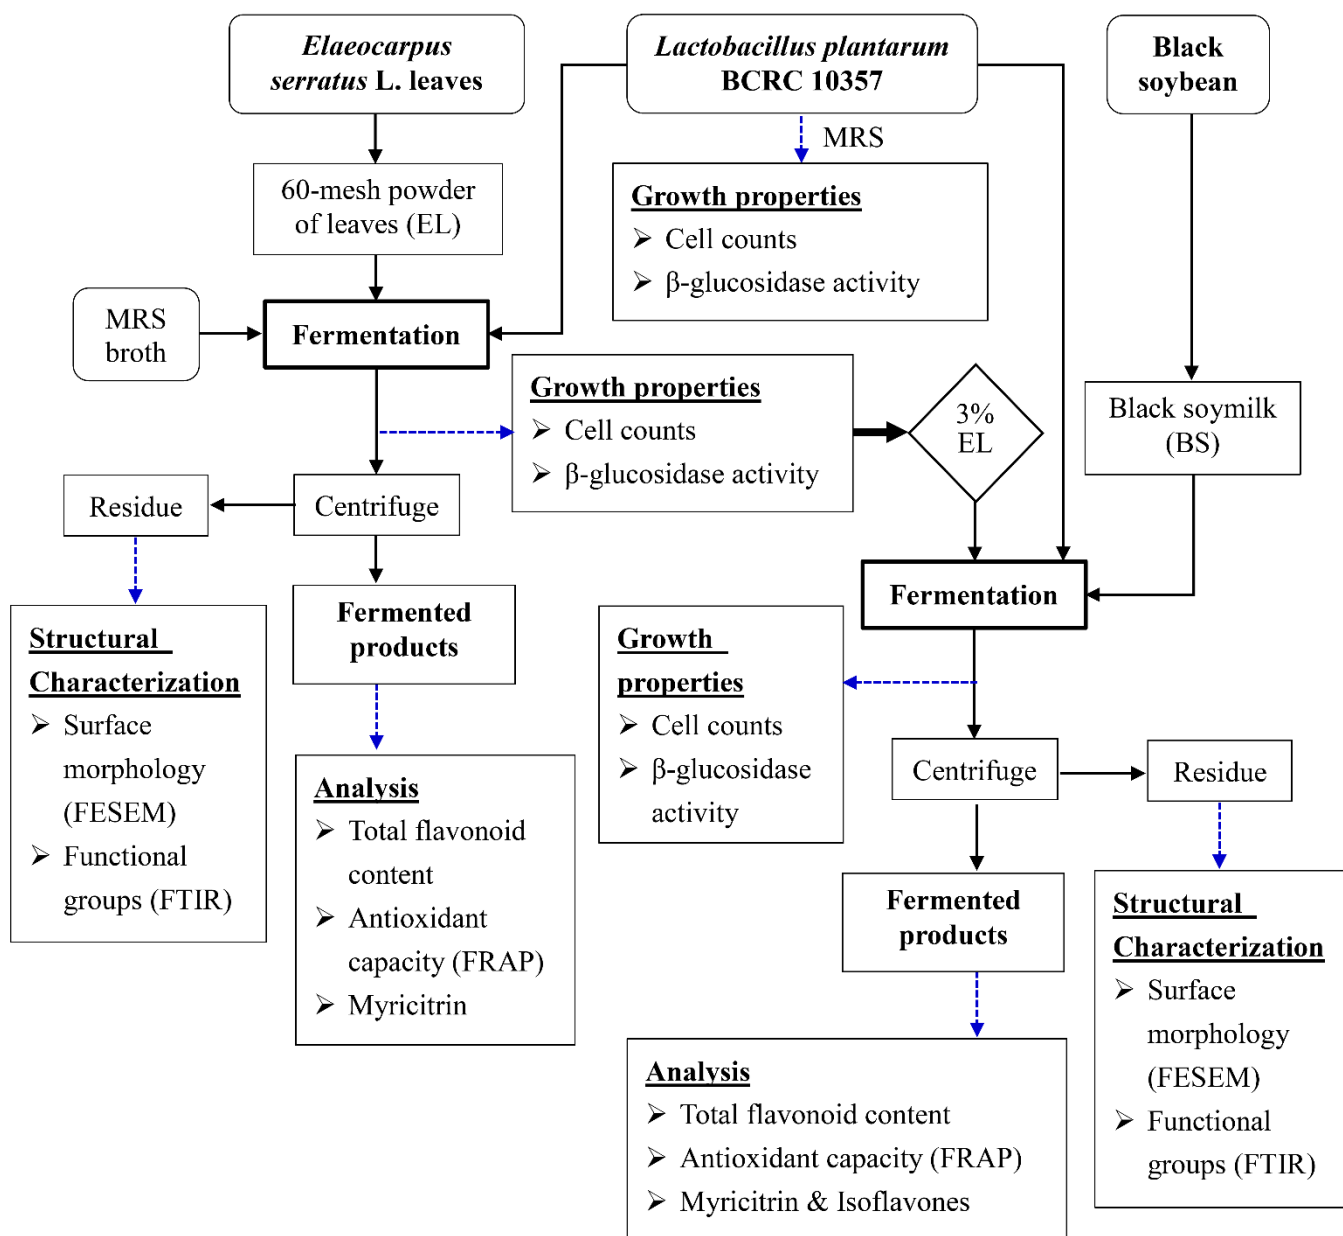

Figure S1. The scheme summarizing the experimental steps, methods, and analysis of this study.

**Table S1.** Comparison of viable cell counts of *L. plantarum* BCRC 10357 for various %EL in MRS during 48 h of fermentation <sup>1</sup>.

| Fermentation<br>time (h) | Viable cell counts (log CFU/ml) |                            |                            |                            |                            |
|--------------------------|---------------------------------|----------------------------|----------------------------|----------------------------|----------------------------|
|                          | Control                         | 0.5% EL                    | 1% EL                      | 3% EL                      | 5% EL                      |
| 0                        | 7.69 ± 0.01 <sup>Ca</sup>       | 7.59 ± 0.04 <sup>Cab</sup> | 7.62 ± 0.07 <sup>Cab</sup> | 7.57 ± 0.08 <sup>Bb</sup>  | 7.65 ± 0.04 <sup>Cab</sup> |
| 12                       | 9.58 ± 0.02 <sup>Aab</sup>      | 9.57 ± 0.10 <sup>Aab</sup> | 9.66 ± 0.02 <sup>Aa</sup>  | 9.51 ± 0.05 <sup>Ab</sup>  | 9.39 ± 0.02 <sup>Bc</sup>  |
| 24                       | 9.64 ± 0.04 <sup>Aab</sup>      | 9.73 ± 0.10 <sup>Aa</sup>  | 9.72 ± 0.07 <sup>Aa</sup>  | 9.63 ± 0.03 <sup>Aab</sup> | 9.55 ± 0.04 <sup>Ab</sup>  |
| 36                       | 8.47 ± 0.08 <sup>Bbc</sup>      | 8.29 ± 0.62 <sup>Bc</sup>  | 9.05 ± 0.52 <sup>Bab</sup> | 9.43 ± 0.33 <sup>Aa</sup>  | 9.56 ± 0.04 <sup>Aa</sup>  |
| 48                       | 7.78 ± 0.10 <sup>Cb</sup>       | 7.43 ± 0.22 <sup>Cb</sup>  | 7.40 ± 0.33 <sup>Cb</sup>  | 7.53 ± 0.39 <sup>Bb</sup>  | 9.52 ± 0.03 <sup>Aa</sup>  |

<sup>1</sup> The data were expressed as mean ± standard deviations ( $n = 3$ ). Different superscript uppercase letters at the same columns were significantly different ( $p < 0.05$ ) by Duncan's multiple range test. Different superscript lower-case letters at the same row were significantly different ( $p < 0.05$ ) by Duncan's multiple range test.

**Table S2.** Comparison of  $\beta$ -glucosidase activity of *L. plantarum* BCRC 10357 for various %EL in MRS during 48 h of fermentation <sup>1</sup>.

| Fermentation<br>time (h) | $\beta$ -Glucosidase activity (U/ml) |                             |                            |                            |                             |
|--------------------------|--------------------------------------|-----------------------------|----------------------------|----------------------------|-----------------------------|
|                          | Control                              | 0.5% EL                     | 1% EL                      | 3% EL                      | 5% EL                       |
| 0                        | 0.00 ± 0.00 <sup>Da</sup>            | 0.00 ± 0.00 <sup>Ca</sup>   | 0.00 ± 0.00 <sup>Ca</sup>  | 0.00 ± 0.00 <sup>Ba</sup>  | 0.00 ± 0.00 <sup>Da</sup>   |
| 12                       | 16.56 ± 1.02 <sup>Aa</sup>           | 12.56 ± 1.69 <sup>Bbc</sup> | 9.21 ± 0.36 <sup>Bd</sup>  | 12.94 ± 0.69 <sup>Ab</sup> | 10.45 ± 1.51 <sup>Bcd</sup> |
| 24                       | 15.47 ± 0.13 <sup>Bab</sup>          | 14.61 ± 1.72 <sup>Ab</sup>  | 18.36 ± 2.38 <sup>Aa</sup> | 14.16 ± 1.35 <sup>Ab</sup> | 14.48 ± 2.20 <sup>Ab</sup>  |
| 36                       | 2.33 ± 0.15 <sup>Cc</sup>            | 0.00 ± 0.00 <sup>Cd</sup>   | 0.00 ± 0.00 <sup>Cd</sup>  | 13.71 ± 0.94 <sup>Aa</sup> | 7.32 ± 1.07 <sup>Cb</sup>   |
| 48                       | 0.05 ± 0.09 <sup>Db</sup>            | 0.00 ± 0.00 <sup>Cb</sup>   | 0.00 ± 0.00 <sup>Cb</sup>  | 0.00 ± 0.00 <sup>Bb</sup>  | 5.89 ± 2.06 <sup>Ca</sup>   |

<sup>1</sup> The data were expressed as mean ± standard deviations ( $n = 3$ ). Different superscript uppercase letters at the same columns were significantly different ( $p < 0.05$ ) by Duncan's multiple range test. Different superscript lower-case letters at the same row were significantly different ( $p < 0.05$ ) by Duncan's multiple range test.

**Table S3.** Comparison of total flavonoids content (TFC) and ferric reducing antioxidant power (FRAP) in fermented product (FP) for various %EL in MRS during 48 h of fermentation by *L. plantarum* BCRC 10357<sup>1</sup>.

| Item                                                            | Fermentation time (h) | Ratio of EL                       |                                   |                                   |                                   |
|-----------------------------------------------------------------|-----------------------|-----------------------------------|-----------------------------------|-----------------------------------|-----------------------------------|
|                                                                 |                       | 0.5% EL                           | 1% EL                             | 3% EL                             | 5% EL                             |
| <b>Bioactive Compounds</b><br>TFC<br>( $\mu\text{g-RE/g-FP}$ )  | 0                     | 207.10 $\pm$ 56.84 <sup>b</sup>   | 225.52 $\pm$ 76.63 <sup>b</sup>   | 246.39 $\pm$ 38.11 <sup>b</sup>   | 437.38 $\pm$ 54.87 <sup>c</sup>   |
|                                                                 | 24                    | 1215.60 $\pm$ 208.62 <sup>a</sup> | 1205.06 $\pm$ 195.24 <sup>a</sup> | 2257.94 $\pm$ 472.77 <sup>a</sup> | 1682.26 $\pm$ 296.09 <sup>b</sup> |
|                                                                 | 48                    | 1030.28 $\pm$ 26.13 <sup>a</sup>  | 1167.36 $\pm$ 104.28 <sup>a</sup> | 1865.31 $\pm$ 155.87 <sup>a</sup> | 2533.41 $\pm$ 208.85 <sup>a</sup> |
| <b>Antioxidant Capacity</b><br>FRAP<br>( $\text{mg-TRE/g-FP}$ ) | 0                     | 1.76 $\pm$ 0.31 <sup>b</sup>      | 1.78 $\pm$ 0.45 <sup>b</sup>      | 1.69 $\pm$ 0.36 <sup>b</sup>      | 2.00 $\pm$ 0.09 <sup>b</sup>      |
|                                                                 | 24                    | 6.38 $\pm$ 0.41 <sup>a</sup>      | 8.30 $\pm$ 0.56 <sup>a</sup>      | 9.61 $\pm$ 1.37 <sup>a</sup>      | 7.33 $\pm$ 1.51 <sup>a</sup>      |
|                                                                 | 48                    | 6.91 $\pm$ 0.96 <sup>a</sup>      | 7.70 $\pm$ 0.83 <sup>a</sup>      | 8.43 $\pm$ 0.87 <sup>a</sup>      | 9.11 $\pm$ 0.80 <sup>a</sup>      |

<sup>1</sup> The data were expressed as mean  $\pm$  standard deviations ( $n = 3$ ). Different superscript letters at the same columns were significantly different ( $p < 0.05$ ) by Duncan's multiple range test.

**Table S4.** Comparison of myricitrin content in fermented product (FP) for various %EL in MRS during 48 h of fermentation by *L. plantarum* BCRC 10357<sup>1</sup>.

| Bioactive Compounds                  | Fermentation time (h) | Ratio of EL                     |                                 |                                   |                                   |
|--------------------------------------|-----------------------|---------------------------------|---------------------------------|-----------------------------------|-----------------------------------|
|                                      |                       | 0.5% EL                         | 1% EL                           | 3% EL                             | 5% EL                             |
| Myricitrin<br>( $\mu\text{g/g-FP}$ ) | 0                     | 34.38 $\pm$ 12.07 <sup>c</sup>  | 49.96 $\pm$ 12.28 <sup>c</sup>  | 115.03 $\pm$ 20.79 <sup>b</sup>   | 159.61 $\pm$ 13.53 <sup>a</sup>   |
|                                      | 24                    | 232.22 $\pm$ 48.65 <sup>c</sup> | 339.53 $\pm$ 51.83 <sup>c</sup> | 1126.70 $\pm$ 237.46 <sup>a</sup> | 697.96 $\pm$ 127.82 <sup>b</sup>  |
|                                      | 48                    | 222.16 $\pm$ 18.35 <sup>c</sup> | 317.58 $\pm$ 47.09 <sup>c</sup> | 1002.41 $\pm$ 197.68 <sup>b</sup> | 1425.33 $\pm$ 108.67 <sup>a</sup> |

<sup>1</sup> The data were expressed as mean  $\pm$  standard deviations ( $n = 3$ ). Different superscript letters at the same rows were significantly different ( $p < 0.05$ ) by Duncan's multiple range test.

**Table S5.** Comparison of total flavonoids content (TFC), myricitrin and ferric reducing antioxidant power (FRAP) in fermented product extract (FPE) for 3%EL in MRS and 3%EL in black soymilk (BSEL) during 48 h of fermentation by *L. plantarum* BCRC 10357<sup>1</sup>.

| Fermentation medium | Fermentation time (h) | TFC<br>( $\mu\text{g-RE/g-FPE}$ )  | Myricitrin<br>( $\mu\text{g/g-FPE}$ ) | FRAP<br>( $\text{mg-TRE/g-FPE}$ ) |
|---------------------|-----------------------|------------------------------------|---------------------------------------|-----------------------------------|
| 3% EL               | 0                     | 2630.42 $\pm$ 708.80 <sup>b</sup>  | 1223.85 $\pm$ 325.82 <sup>b</sup>     | 17.89 $\pm$ 4.74 <sup>a</sup>     |
|                     | 24                    | 4052.12 $\pm$ 254.76 <sup>a</sup>  | 2022.36 $\pm$ 220.53 <sup>ab</sup>    | 17.42 $\pm$ 1.91 <sup>a</sup>     |
|                     | 48                    | 4106.67 $\pm$ 640.33 <sup>a</sup>  | 2222.91 $\pm$ 623.49 <sup>a</sup>     | 18.59 $\pm$ 3.40 <sup>a</sup>     |
| BSEL                | 0                     | 8670.89 $\pm$ 1786.51 <sup>a</sup> | 1426.61 $\pm$ 119.96 <sup>b</sup>     | 27.18 $\pm$ 2.39 <sup>a</sup>     |
|                     | 24                    | 9267.88 $\pm$ 1964.09 <sup>a</sup> | 2817.17 $\pm$ 435.51 <sup>a</sup>     | 27.83 $\pm$ 3.01 <sup>a</sup>     |
|                     | 48                    | 9643.64 $\pm$ 1120.21 <sup>a</sup> | 2297.06 $\pm$ 328.35 <sup>a</sup>     | 26.98 $\pm$ 2.21 <sup>a</sup>     |

<sup>1</sup> The data were expressed as mean  $\pm$  standard deviations ( $n = 3$ ). Different superscript letters at the same columns were significantly different ( $p < 0.05$ ) by Duncan's multiple range test.
